# Supplementary material for: Intrascleral Suture Anchoring: A Flapless/Grooveless Four-Point Intraocular Lens Fixation Technique
Source: J Ophthalmol. 2020 Dec 1;2020:6642007. doi: 10.1155/2020/6642007 (PMC7727019; doi:10.1155/2020/6642007)
Supplement: Supplementary Materials — Video Clip 1: intrascleral suture anchoring: a flapless four-point intraocular lens fixation technique. [file 6642007.f1.zip]

Archive with 1 entries (1 files):
- Video.mp4
